# Supplementary material for: Time varying changes and uncertainties in the CMIP6 ocean carbon sink from global to regional to local scale
Source: Copernicus journal article supplement (doi:10.5194/esd-2022-19), 2022-05-18
Supplement: Supplementary file 1 [file esd-2022-19-supplement.pdf]

Supplement of

**Time varying changes and uncertainties in the CMIP6 ocean carbon sink from global to regional to local scale**

Parsa Gooya<sup>1</sup>, Neil Swart<sup>2,1</sup>, Roberta Hamme<sup>1</sup>

<sup>1</sup>School of Earth and Ocean Sciences, University of Victoria, Victoria, BC, V8P 5C2, Canada

<sup>2</sup>Canadian Centre for Climate Modelling and Analysis, Environment and Climate Change Canada, Victoria, BC, V8W 2P2, Canada

*Correspondence to:* Parsa Gooya ([parsa.g76@gmail.com](mailto:parsa.g76@gmail.com))

## **S1. Model selection**

The data used in this study was accessed through the [PANGEO CMIP6 catalogue on Google Cloud \(https://storage.googleapis.com/cmip6/cmip6-zarr-consolidated-stores.csv\)](https://storage.googleapis.com/cmip6/cmip6-zarr-consolidated-stores.csv), and cross verified against data published on the [Earth System Grid Federation \(ESGF, https://esgf-node.llnl.gov/search/cmip6/\)](https://esgf-node.llnl.gov/search/cmip6/). Sixteen models submitted at least one realization for historical, ssp126, ssp245, and ssp585 scenarios (Table S1). Three models were excluded, leaving 13 total models in our analysis.

Among these, NorESM2-MM was excluded because the same realization was not available for all three scenarios.

BCC-CSM2-MR was excluded because it showed sink values that were three orders of magnitude larger than other models. To make sure this is not an issue with the uploaded dataset to google cloud, the historical dataset was downloaded directly from ESGF and yielded the same results. The units according to the published metadata are  $\text{kg m}^{-2} \text{s}^{-1}$  of carbon, but may be in error.

CNRM-ESM2-1 was excluded because the historical model results are out of the range of uncertainty of the observation data over 1960-2020 from the Global Carbon Project of 2021 (Friedlingstein et al., 2021) by a large offset (lower pink line in Fig. S1).

| Institution                                                                 | Model(s)                                                     | Main Reference(s)                               | Realization(s)     |
|-----------------------------------------------------------------------------|--------------------------------------------------------------|-------------------------------------------------|--------------------|
| Beijing Climate Center (China)                                              | BCC-CSM2-MR                                                  | Wu et al. (2019);<br>Xin et al. (2019)          | Excluded           |
| National Center for Atmospheric Research (USA)                              | CESM2 <sup>1</sup> ,<br>CESM2-WACCM <sup>1</sup>             | Danabasoglu et al. (2020)                       | rlilp1fl, rlilp1fl |
| Norwegian Earth System Model (Nowrwegen)                                    | NorESM2-LM <sup>2</sup> ,<br>NorESM2-MM                      | Tijjputra et al. (2020)                         | rlilp1fl, excluded |
| Institut Pierre Simon Laplace (France)                                      | IPSL-CM6A-LR <sup>3</sup>                                    | Boucher et al. (2020)                           | rlilp1fl           |
| Institute for Numerical Mathematics (Russia)                                | INM-CM4-8 <sup>4</sup> ,<br>INM-CM5-0 <sup>4</sup>           | Volodin et al. (2017,2018)                      | rlilp1fl, rlilp1fl |
| JAMSTEC, NIES, AORI, U. of Tokyo (Japan)                                    | MIROC-ES2L <sup>5,6</sup>                                    | Hajima et al. (2020)                            | rlilp1f2           |
| Max Planck Institute for Meteorology (Germany)                              | MPI-ESM1-2-HR <sup>7,8</sup> ,<br>MPI-ESM1-2-LR <sup>9</sup> | Mauristen et al. (2019)                         | rlilp1fl, rlilp1fl |
| Met Office Hadley Center (UK) and Natural Environment Research Council (UK) | UKESM1-0-LL <sup>10,11</sup>                                 | Sellar et al. (2019)<br>Williams et al. (2017)  | rlilp1f2           |
| Canadian Centre for Climate Modelling and Analysis (Canada)                 | CanESM5 <sup>12</sup><br>CanESM5-CanOE <sup>12</sup>         | Swart et al. (2019a)<br>Christian et al. (2021) | rlilp1fl, rlilp2fl |
| Geophysical Fluid Dynamics Laboratory (USA)                                 | GFDL-ESM4 <sup>13,14</sup>                                   | Held et al. (2019)                              | rlilp1fl           |
| CNRM-CERFACS (France)                                                       | CNRM-ESM2-1                                                  | Voltaire et al. (2019);                         | excluded           |

- <sup>1</sup> Danabasoglu (2019a, 2019b, 2019c, 2019d, 2019e, 2019f, 2019g, 2019h)
- <sup>2</sup> Øyvind et al. (2019a, 2019b, 2019c, 2019d)
- <sup>3</sup> Boucher et al. (2018, 2019a, 2019b, 2019c)
- <sup>4</sup> Volodin et al. (2019a, 2019b, 2019c, 2019d, 2019e, 2019f, 2019g, 2019h)
- <sup>5</sup> Hajima et al. (2019)
- <sup>6</sup> Tachiiri et al. (2019a, 2019b, 2019c)
- <sup>7</sup> Jungclaus et al. (2019)
- <sup>8</sup> Schupfner et al. (2019a, 2019b, 2019c)
- <sup>9</sup> Wieners et al. (2019a, 2019b, 2019c, 2019d)
- <sup>10</sup> Tang et al. (2019)
- <sup>11</sup> Good et al. (2019a, 2019b, 2019c)
- <sup>12</sup> Swart et al. (2019b, 2019c, 2019d, 2019e, 2019f, 2019g, 2019h, 2019i)
- <sup>13</sup> Krasting et al. (2018)
- <sup>14</sup> John et al. (2018a, 2018b, 2018c)

**Table S1-** Models that have submitted at least one realization for all of the historical, ssp126, ssp245 and ssp245 experiments as well as the realization chosen for this study. The footnotes indicate references for the corresponding CMIP6 dataset used.

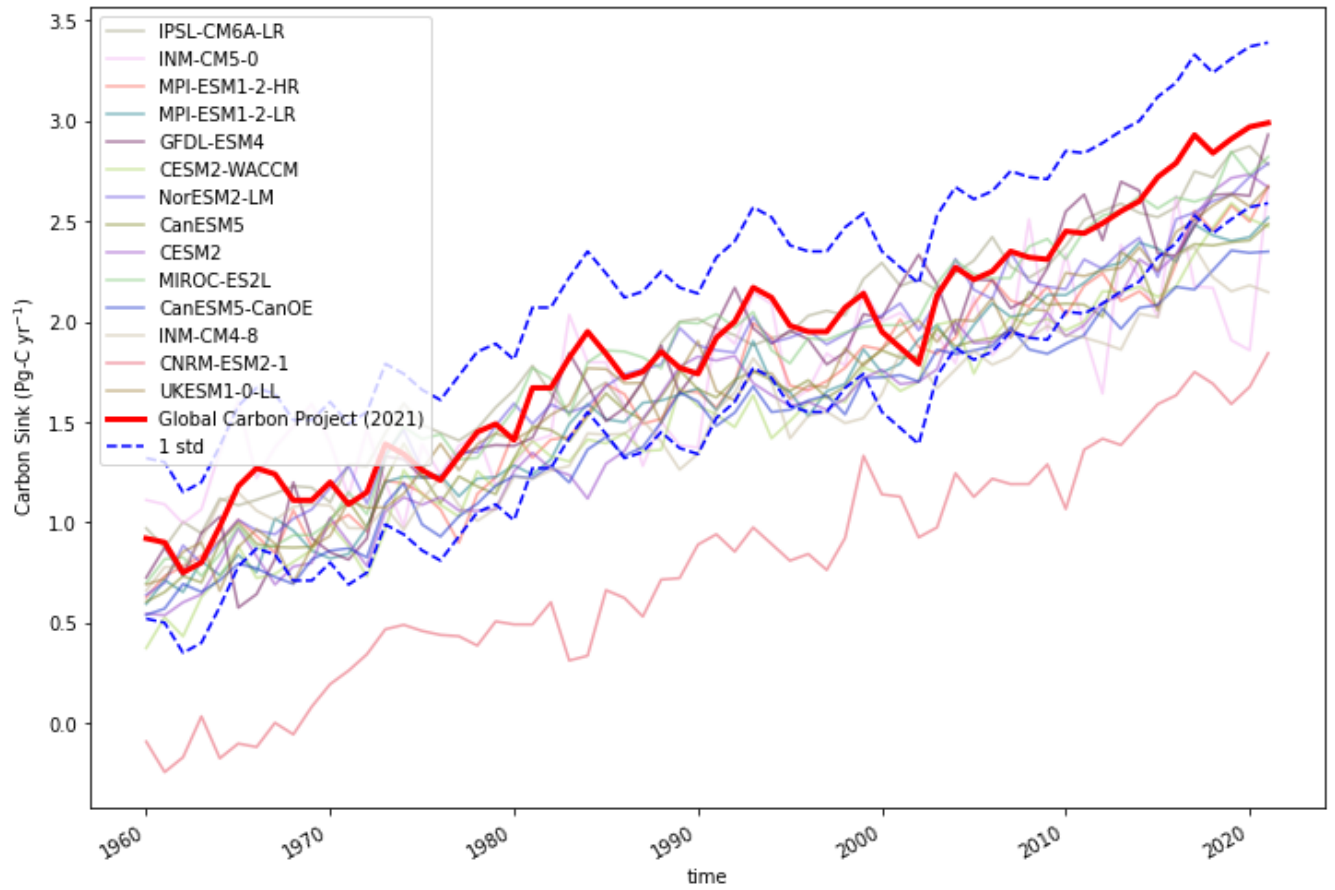

**Figure S1-** Ocean CO<sub>2</sub> sink from various estimates. The thick red line is the ocean CO<sub>2</sub> sink (SOCEAN) from the Global Carbon Project 2021 (Friedlingstein et al., 2021). The dashed blue lines represent the uncertainty bounds of the observations ( $\pm 1$  standard deviation). The other lines show the 13 models included in the analysis and CNRM-ESM2-1 in pink at the bottom.

## S2. Use of SMILE to measure internal variability

The ensemble size of a SMILE must be large enough to accurately estimate internal variability from the variance across the ensemble members. The global average of the internal variability at each grid cell grows as the number of ensemble members included in the estimate increases and then becomes constant after a certain point (Fig. S2). Moreover, at regional scales even more members are required to converge than at the global scale. However, only 3 models have enough realizations (at least 20) to be considered well sampled over the historical period, and only CanESM5 has enough realizations for all three scenarios.

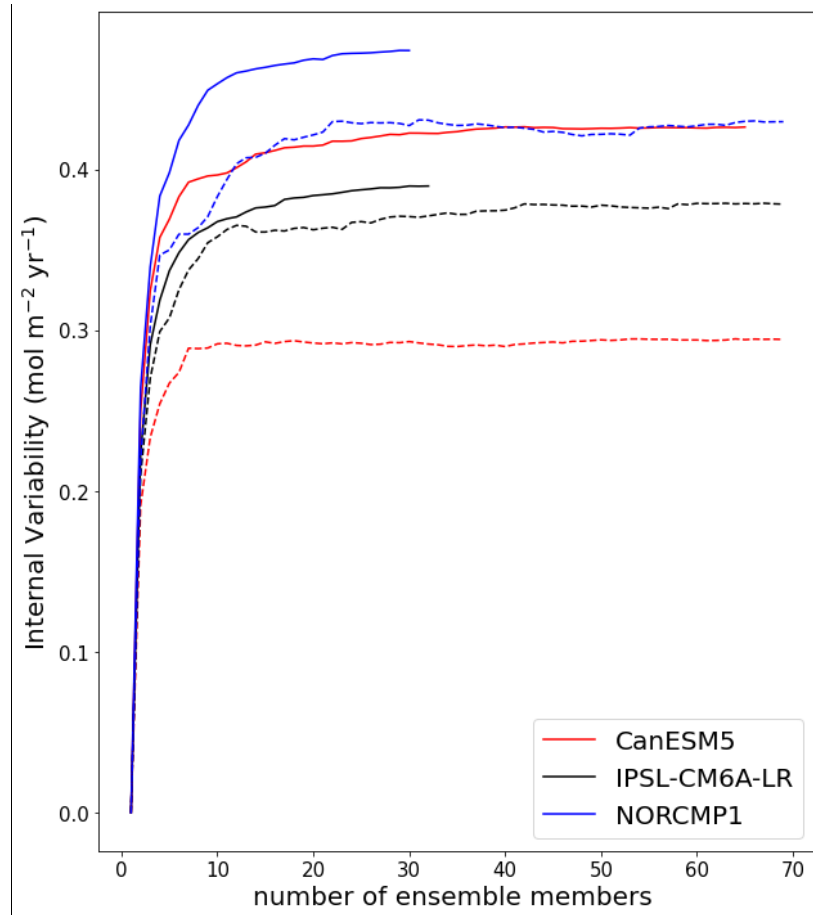

**Figure S2-** Global average of internal variability at each grid point (measured as two times the standard deviation). Solid lines show internal variability across different ensemble sizes of different models over 1995-2015. Dashed lines show internal variability for pi-Control runs where the ensembles were acquired by choosing 70 random years (at least 10 years apart) from the pi-Control run

This leaves only one SMILE that can be used to estimate internal variability as a function of time and scenario. Our analysis shows that for the three SMILES that are well sampled over the historical period, the global average of the internal variability at each grid point is consistent between the models with an error

of less than 10 percent (Fig. S3). Therefore, the CanESM5 large ensemble is a suitable choice to calculate internal variability. Additionally, the results show that internal variability has a clear trend in time for different scenarios that HS09 did not consider but which should not be ignored. This trend is likely even more important on regional scales. The dashed black line in Fig. S3 is the IPSL model over the entire time period using ssp585, but with only six available realizations. Note that the IPSL ssp585 estimate is lower than the others, confirming that internal variability would be under-estimated if the ensemble is not well-sampled.

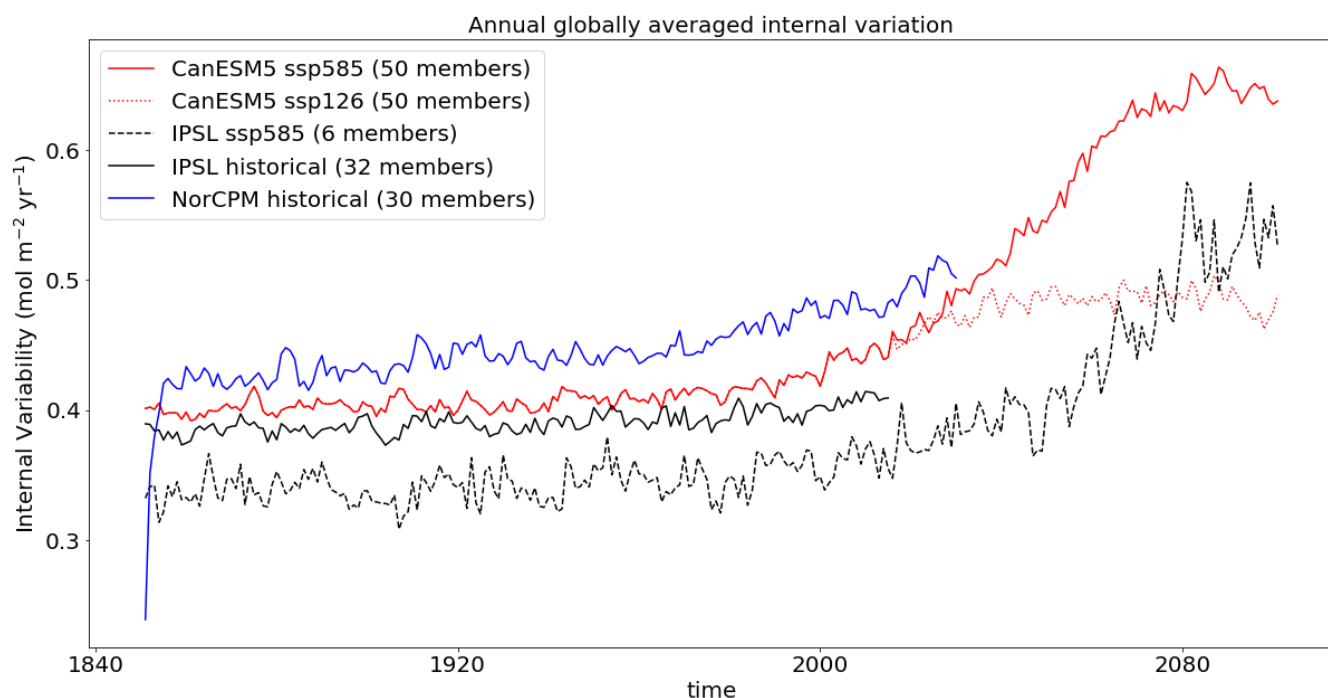

**Figure S3-** Timeseries of the globally averaged internal variability measured as two times the standard deviation within a SMILE. The historical period for the three SMILES, ssp585 for CanESM5 and IPSL, and ssp126 for CanESM5 are shown on this plot. For IPSL and NorCPM models, the full time period for ssp585 does not include enough realizations to be well sampled.

### S3. Correcting for internal variability included in the model spread

Mathematically, the spread measured as the standard deviation across the first realization of each model can be related to model uncertainty as follows:

$$U_M(t, l) = 2 \sqrt{\frac{1}{N_s} \sum_{s=1}^{N_s} \text{Var}_m(F(m, s, t, l))} \quad (\text{S1})$$

where  $\text{Var}_m$  refers to the variance across the models. We can relate the variance of the total signal ( $T$ ) to that of the forced signal ( $F$ ) and the residual ( $R$ ) as:

$$\begin{aligned} \text{Var}_m(T(m, s, t, l)) &= \text{Var}_m(F(m, s, t, l) + R(m, s, t, l)) = \\ \text{Var}_m(F(m, s, t, l)) &+ \text{Var}_m(R(m, s, t, l)) + 2\text{COV}_m(F, R) \end{aligned} \quad (\text{S2})$$

where  $\text{COV}_m$  is the covariance between the forced signal and the residuals. Assuming that the residual from the forced signal for every realization (internal variability) is independent of the forced signal, the covariance is zero and the equation above can be re-ordered as:

$$\text{Var}_m(F(m, s, t, l)) = \text{Var}_m T(m, s, t, l) - \text{Var}_m(R(m, s, t, l)) \quad (\text{S3})$$

The term  $\text{Var}_m(R(m, s, t, l))$  refers to the variance of the residual from the forced signal across many models' first realization. If the number of models is large enough and given that internal variability is stochastic noise, based on the central limit theorem,  $\text{Var}_m(R(m, s, t, l))$  equals the internal variability. Thus:

$$\text{Var}_m(F(m, s, t, l)) \sim \text{Var}_m(T(m, s, t, l)) - I(s, t, l) \quad (\text{S4})$$

where  $I(s, t, l)$  refers to internal variability at time  $t$ , scenario  $s$ , and location  $l$ . In Appendix B we showed that if the number of ensemble members included when estimating internal variability is not large enough, the variation is not well sampled and is biased low. Concretely, if we have 13 first realizations of 13 models and 50 members of one model to estimate internal variability, the internal variability measured using the 50 members would be larger than the term  $\text{Var}_m(R(m, s, t, l))$ , since  $\text{Var}_m(R(m, s, t, l))$  does not represent internal variability in a well-sampled ensemble. Thus, the model uncertainty acquired by subtracting the "50-member internal variability" from the variance across first realizations of the models would be smaller than it should be. Instead, the best approximation is to sample our large ensemble (CanESM5) with the same number of realizations as the number of models we have. For this correction, 1000 randomly selected sets of 13 ensemble members of CanESM5 were chosen, the variance determined



within each set, then averaged over the 1000 sets, and finally that average internal variance was deducted from the total variance across the 13 models.

## References

Boucher, O., Denvil, S., Levavasseur, G., Cozic, A., Caubel, A., Foujols, M., Meurdesoif, Y., Cadule, P., Devilliers, M., Ghattas, J., Lebas, N., Lurton, T., Mellul, L., Musat, I., Mignot, J., Cheruy, F.: IPSL IPSL-CM6A-LR model output prepared for CMIP6 CMIP historical, Earth System Grid Federation, doi:10.22033/ESGF/CMIP6.5195, 2018.

Boucher, O., Denvil, S., Levavasseur, G., Cozic, A., Caubel, A., Foujols, M., Meurdesoif, Y., Cadule, P., Devilliers, M., Dupont, E., Lurton, T. : IPSL IPSL-CM6A-LR model output prepared for CMIP6 ScenarioMIP ssp126, Earth System Grid Federation, doi:10.22033/ESGF/CMIP6.5262, 2019a.

Boucher, O., Denvil, S., Levavasseur, G., Cozic, A., Caubel, A., Foujols, M., Meurdesoif, Y., Cadule, P., Devilliers, M., Dupont, E., Lurton, T. : IPSL IPSL-CM6A-LR model output prepared for CMIP6 ScenarioMIP ssp245, Earth System Grid Federation, doi:10.22033/ESGF/CMIP6.5264, 2019b.

Boucher, O., Denvil, S., Levavasseur, G., Cozic, A., Caubel, A., Foujols, M., Meurdesoif, Y., Cadule, P., Devilliers, M., Dupont, E., Lurton, T. : IPSL IPSL-CM6A-LR model output prepared for CMIP6 ScenarioMIP ssp585, Earth System Grid Federation, doi:10.22033/ESGF/CMIP6.5271, 2019c.

Boucher, O., Servonnat, J., Albright, A., Aumont, O., Balkanski, Y., Bastrikov, V., Bekki, S., Bonnet, R., Bony, S., Bopp, L., Braconnot, P., Brockmann, P., Cadule, P., Caubel, A., Cheruy, F., Codron, F., Cozic, A., Cugnet, D., D'Andrea, F., Davini, P., de Lavergne, C., Denvil, S., Deshayes, J., Devilliers, M., Ducharne, A., Dufresne, J., Dupont, E., Éthé, C., Fairhead, L., Falletti, L., Flavoni, S., Foujols, M., Gardoll, S., Gastineau, G., Ghattas, J., Grandpeix, J., Guenet, B., Guez, L., Guilyardi, E., Guimberteau, M., Hauglustaine, D., Hourdin, F., Idelkadi, A., Joussaume, S., Kageyama, M., Khodri, M., Krinner, G., Lebas, N., Levavasseur, G., Lévy, C., Li, L., Lott, F., Lurton, T., Luyssaert, S., Madec, G., Madeleine, J., Maignan, F., Marchand, M., Marti, O., Mellul, L., Meurdesoif, Y., Mignot, J., Musat, I., Ottlé, C., Peylin, P., Planton, Y., Polcher, J., Rio, C., Rochetin, N., Rousset, C., Sepulchre, P., Sima, A., Swingedouw, D., Thiéblemont, R., Traore, A., Vancoppenolle, M., Vial, J., Vialard, J., Viovy, N., and Vuichard, N.: Presentation and evaluation of the IPSL-CM6A-LR climate model, *J. Adv. Model. Earth Syst.*, 12, doi:10.1029/2019MS002010, 2020.

Christian, J. R., Denman, K. L., Hayashida, H., Holdsworth, A. M., Lee, W. G., Riche, O. G. J., Shao, A. E., Steiner, N., and Swart, N. C.: Ocean biogeochemistry in the Canadian Earth System Model version 5.0.3: CanESM5 and CanESM5-CanOE, *Geosci. Model Dev. Discuss.* [preprint], hdoi:.5194/gmd-2021-327, in review, 2021.

Danabasoglu, G.: NCAR CESM2 model output prepared for CMIP6 CMIP historical. Earth System Grid Federation, doi: 10.22033/ESGF/CMIP6.7627, 2019a.

Danabasoglu, G.: NCAR CESM2 model output prepared for CMIP6 ScenarioMIP ssp126, Earth System Grid Federation, doi:10.22033/ESGF/CMIP6.7746, 2019b.

Danabasoglu, G.: NCAR CESM2 model output prepared for CMIP6 ScenarioMIP ssp245, Earth System Grid Federation, doi:10.22033/ESGF/CMIP6.7748, 2019c.

Danabasoglu, G.: NCAR CESM2 model output prepared for CMIP6 ScenarioMIP ssp585, Earth System Grid Federation, doi:https://doi.org/10.22033/ESGF/CMIP6.7768, 2019d.

Danabasoglu, G.: NCAR CESM2-WACCM model output prepared for CMIP6 CMIP historical, Earth System Grid Federation, doi:10.22033/ESGF/CMIP6.10071, 2019e.

Danabasoglu, G. NCAR CESM2-WACCM model output prepared for CMIP6 ScenarioMIP ssp126, Earth System Grid Federation, doi:10.22033/ESGF/CMIP6.10100, 2019f.

Danabasoglu, G.: NCAR CESM2-WACCM model output prepared for CMIP6 ScenarioMIP ssp245, Earth System Grid Federation, doi:10.22033/ESGF/CMIP6.10101, 2019g.

Danabasoglu, G.: NCAR CESM2-WACCM model output prepared for CMIP6 ScenarioMIP ssp585, Earth System Grid Federation, doi:<https://doi.org/10.22033/ESGF/CMIP6.10115>, 2019h.

Danabasoglu, G., Lamarque, J. F., Bacmeister, J., Bailey, D. A., DuVivier, A. K., Edwards, J., Emmons, L. K., Fasullo, J., Garcia, R., Gettelman, A., Hannay, C., Holland, M. M., Large, W. G., Lauritzen, P. H., Lawrence, D. M., Lenaerts, J. T. M., Lindsay, K., Lipscomb, W. H., Mills, M. J., Neale, R., Oleson, K. W., Otto-Bliesner, B., Phillips, A. S., Sacks, W., Tilmes, S., van Kampenhout, L., Vertenstein, M., Bertini, A., Dennis, J., Deser, C., Fischer, C., Fox-Kemper, B., Kay, J. E., Kinnison, D., Kushner, P. J., Larson, V. E., Long, M. C., Mickelson, S., Moore, J. K., Nienhouse, E., Polvani, L., Rasch, P. J., and Strand W. G.: The Community Earth System Model Version 2 (CESM2). *Journal of Advances in Modeling Earth Systems*, 12, doi:10.1029/2019MS001916, 2020.

Good, P., Sellar, A., Tang, Y., Rumbold, S., Ellis, R., Kelley, D., Kuhlbrodt, T.: MOHC UKESM1.0-LL model output prepared for CMIP6 ScenarioMIP ssp126, Earth System Grid Federation, doi:10.22033/ESGF/CMIP6.6333, 2019a.

Good, P., Sellar, A., Tang, Y., Rumbold, S., Ellis, R., Kelley, D., Kuhlbrodt, T.: MOHC UKESM1.0-LL model output prepared for CMIP6 ScenarioMIP ssp245, Earth System Grid Federation. doi:10.22033/ESGF/CMIP6.6339, 2019b.

Good, P., Sellar, A., Tang, Y., Rumbold, S., Ellis, R., Kelley, D., Kuhlbrodt, T.: MOHC UKESM1.0-LL model output prepared for CMIP6 ScenarioMIP ssp585 Earth System Grid Federation, doi:10.22033/ESGF/CMIP6.6405, 2019c.

Hajima, T., Watanabe, M., Yamamoto, A., Tatebe, H., Noguchi, M. A., Abe, M., Ohgaito, R., Ito, A., Yamazaki, D., Okajima, H., Ito, A., Takata, K., Ogochi, K., Watanabe, S., and Kawamiya, M.: Development of the MIROC-ES2L Earth system model and the evaluation of biogeochemical processes and feedbacks, *Geosci. Model Dev.*, 13, 2197–2244, doi:10.5194/gmd-13-2197-2020, 2020.

Hajima, T., Abe, M., Arakawa, O., Suzuki, T., Komuro, Y., Ogura, T., Ogochi, K., Watanabe, M., Yamamoto, A., Tatebe, H., Noguchi, M. A., Ohgaito, R., Ito, A., Yamazaki, D., Ito, A., Takata, K., Watanabe, S., Kawamiya, M., Tachiiri, K.: MIROC MIROC-ES2L model output prepared for CMIP6 CMIP historical, Earth System Grid Federation, doi:10.22033/ESGF/CMIP6.5602, (2019).

Jungclaus, J., Bittner, M., Wieners, K., Wachsmann, F., Schupfner, M., Legutke, S., Giorgetta, M., Reick, C., Gayler, V., Haak, H., de Vrese, P., Raddatz, T., Esch, M., Mauritsen, T., von Storch, J., Behrens, J., Brovkin, V., Claussen, M., Crueger, T., Fast, I., Fiedler, S., Hagemann, S., Hohenegger, C., Jahns, T., Kloster, S., Kinne, S., Lasslop, G., Kornbluh, L., Marotzke, J., Matei, D., Meraner, K., Mikolajewicz, U., Modali, K., Müller, W., Nabel, J., Notz, D., Peters-von Gehlen, K., Pincus, R., Pohlmann, H., Pongratz, J., Rast, S., Schmidt, H., Schnur, R., Schulzweida, U., Six, K., Stevens, B., Voigt, A., Roeckner, E.: MPI-M MPI-ESM1.2-HR model output prepared for CMIP6 CMIP historical, Earth System Grid Federation, doi:10.22033/ESGF/CMIP6.6594, 2019.

John, J. G., Blanton, C., McHugh, C., Radhakrishnan, A., Rand, K., Vahlenkamp, H., Wilson, C., Zadeh, N. T., Dunne, J. P., Dussin, R., Horowitz, L. W., Krasting, J. P., Lin, P., Malyshev, S., Naik, V., Ploshay, J., Shevliakova, E., Silvers, L., Stock, C., Winton, M., Zeng, Y.: NOAA-GFDL GFDL-ESM4 model output prepared for CMIP6 ScenarioMIP ssp126, Earth System Grid Federation, doi:10.22033/ESGF/CMIP6.8684, 2018a.

John, J. G., Blanton, C., McHugh, C., Radhakrishnan, A., Rand, K., Vahlenkamp, H., Wilson, C., Zadeh, N. T., Dunne, J. P., Dussin, R., Horowitz, L. W., Krasting, J. P., Lin, P., Malyshev, S., Naik, V., Ploshay, J., Shevliakova, E., Silvers, L., Stock, C., Winton, M., Zeng, Y.: NOAA-GFDL GFDL-ESM4 model output prepared for CMIP6 ScenarioMIP ssp245, Earth System Grid Federation, doi:10.22033/ESGF/CMIP6.8686, 2018b.

John, J. G., Blanton, C., McHugh, C., Radhakrishnan, A., Rand, K., Vahlenkamp, H., Wilson, C., Zadeh, N. T., Dunne, J. P., Dussin, R., Horowitz, L. W., Krasting, J. P., Lin, P., Malyshev, S., Naik, V., Ploshay, J., Shevliakova, E., Silvers, L., Stock, C., Winton, M., Zeng, Y.: NOAA-GFDL GFDL-ESM4 model output prepared for CMIP6 ScenarioMIP ssp585, Earth System Grid Federation, doi:10.22033/ESGF/CMIP6.8706, 2018c.

Krasting, J. P., John, J. G., Blanton, C., McHugh, C., Nikonov, S., Radhakrishnan, A., Rand, K., Zadeh, N. T., Balaji, V., Durachta, J., Dupuis, C., Menzel, R., Robinson, T., Underwood, S., Vahlenkamp, H., Dunne, Kr. A., Gauthier, P. PG, Ginoux, P., Griffies, S. M., Hallberg, R., Harrison, M., Hurlin, W., Malyshev, S., Naik, V., Paulot, F., Paynter, D. J., Ploshay, J., Reichl, B. G., Schwarzkopf, D. M., Seman, C. J., Silvers, L., Wyman, B., Zeng, Y., Adcroft, A., Dunne, J. P., Dussin, R., Guo, H., He, J., Held, I. M., Horowitz, L. W., Lin, P., Milly, P.C.D., Shevliakova, E., Stock, C., Winton, M., Wittenberg, A. T., Xie, Y., Zhao, M.: NOAA-GFDL GFDL-ESM4 model output prepared for CMIP6 CMIP historical, Earth System Grid Federation, doi:10.22033/ESGF/CMIP6.8597, 2018.

Mauritsen, T., Bader, J., Becker, T., Behrens, J., Bittner, M., Brokopf, R., Brovkin, V., Claussen, M., Crueger, T., Esch, M., Fast, I., Fiedler, S., Fläschner, D., Gayler, V., Giorgetta, M., Goll, D. S., Haak, H., Hagemann, S., Hedemann, C., Hohenegger, C., Ilyina, T., Jahns, T., Jimenez-de-la-Cuesta, D., Jungclaus, J., Kleinen, T., Kloster, S., Kracher, D., Kinne, S., Kleberg, D., Lasslop, G., Kornblueh, L., Marotzke, J., Matei, D., Meraner, K., Mikolajewicz, U., Modali, K., Möbis, B., Müller, W. A., Nabel, J. E. M. S., Nam, C. C. W., Notz, D., Nyawira, S., Paulsen, H., Peters, K., Pincus, R., Pohlmann, H., Pongratz, J., Popp, M., Raddatz, T. J., Rast, S., Redler, R., Reick, C. H., Rohrschneider, T., Schemann, V., Schmidt, H., Schnur, R., Schulzweida, U., Six, K. D., Stein, L., Stemmler, I., Stevens, B., von Storch, J.-S., Tian, F., Voigt, A., Vrese, P., Wieners, K.-H., Wilkenskjaeld, S., Winkler, A., and Roeckner, E.: Developments in the MPI-M Earth System Model version 1.2 (MPI-ESM1.2) and Its Response to Increasing CO<sub>2</sub>, *J. Adv. Model. Earth Syst.*, 11, 998–1038, doi:10.1029/2018MS001400, 2019.

Schupfner, M., Wieners, KH., Wachsmann, F., Steger, C., Bittner, M., Jungclaus, J., Früh, B., Pankatz, K., Giorgetta, M., Reick, C., Legutke, S., Esch, M., Gayler, V., Haak, H., de Vrese, P., Raddatz, T., Mauritsen, T., von Storch, JS., Behrens, J., Brovkin, V., Claussen, M., Crueger, T., Fast, I., Fiedler, S., Hagemann, S., Hohenegger, C., Jahns, T., Kloster, S., Kinne, S., Lasslop, G., Kornblueh, L., Marotzke, J., Matei, D., Meraner, K., Mikolajewicz, U., Modali, K., Müller, W., Nabel, J., Notz, D., Peters-von Gehlen, K., Pincus, R., Pohlmann, H., Pongratz, J., Rast, S., Schmidt, H., Schnur, R., Schulzweida, U., Six, K., Stevens, B., Voigt, A., Roeckner: EDKRZ MPI-ESM1.2-HR model output prepared for CMIP6 ScenarioMIP ssp126, Earth System Grid Federation, doi:10.22033/ESGF/CMIP6.4397, 2019a.

Schupfner, M., Wieners, KH., Wachsmann, F., Steger, C., Bittner, M., Jungclaus, J., Früh, B., Pankatz, K., Giorgetta, M., Reick, C., Legutke, S., Esch, M., Gayler, V., Haak, H., de Vrese, P., Raddatz, T., Mauritsen, T., von Storch, JS., Behrens, J., Brovkin, V., Claussen, M., Crueger, T., Fast, I., Fiedler, S., Hagemann, S., Hohenegger, C., Jahns, T., Kloster, S., Kinne, S., Lasslop, G., Kornblueh, L., Marotzke, J., Matei, D., Meraner, K., Mikolajewicz, U., Modali, K., Müller, W., Nabel, J., Notz, D., Peters-von Gehlen, K., Pincus, R., Pohlmann, H., Pongratz, J., Rast, S., Schmidt, H., Schnur, R., Schulzweida, U., Six, K., Stevens, B., Voigt, A.,

Roeckner: EDKRZ MPI-ESM1.2-HR model output prepared for CMIP6 ScenarioMIP ssp245, Earth System Grid Federation, doi:10.22033/ESGF/CMIP6.4398, 2019b.

Schupfner, M., Wieners, K.H., Wachsmann, F., Steger, C., Bittner, M., Jungclaus, J., Früh, B., Pankatz, K., Giorgetta, M., Reick, C., Legutke, S., Esch, M., Gayler, V., Haak, H., de Vrese, P., Raddatz, T., Mauritsen, T., von Storch, J.S., Behrens, J., Brovkin, V., Claussen, M., Crueger, T., Fast, I., Fiedler, S., Hagemann, S., Hohenegger, C., Jahns, T., Kloster, S., Kinne, S., Lasslop, G., Kornblueh, L., Marotzke, J., Matei, D., Meraner, K., Mikolajewicz, U., Modali, K., Müller, W., Nabel, J., Notz, D., Peters-von Gehlen, K., Pincus, R., Pohlmann, H., Pongratz, J., Rast, S., Schmidt, H., Schnur, R., Schulzweida, U., Six, K., Stevens, B., Voigt, A., Roeckner: EDKRZ MPI-ESM1.2-HR model output prepared for CMIP6 ScenarioMIP ssp585, Earth System Grid Federation, doi:10.22033/ESGF/CMIP6.4403, 2019c.

Seland, Ø., Bentsen, M., Olivieri, D. J. L., Toniazzo, T., Gjermundsen, A., Graff, L. S., Debernard, J. B., Gupta, A. K., He, Y., Kirkevåg, A., Schwinger, J., Tjiputra, J., Aas, K. S., Bethke, I., Fan, Y., Griesfeller, J., Grini, A., Guo, C., Ilicak, M., Karset, I. H. H., Landgren, O. A., Liakka, J., Moseid, K. O., Nummelin, A., Spensberger, C., Tang, H., Zhang, Z., Heinze, C., Iversen, T., Schulz, M.: NCC NorESM2-LM model output prepared for CMIP6 CMIP historical, Earth System Grid Federation, doi:10.22033/ESGF/CMIP6.8036, 2019a.

Seland, Ø., Bentsen, M., Olivieri, D. J. L., Toniazzo, T., Gjermundsen, A., Graff, L. S., Debernard, J. B., Gupta, A. K., He, Y., Kirkevåg, A., Schwinger, J., Tjiputra, J., Aas, K. S., Bethke, I., Fan, Y., Griesfeller, J., Grini, A., Guo, C., Ilicak, M., Karset, I. H. H., Landgren, O. A., Liakka, J., Moseid, K. O., Nummelin, A., Spensberger, C., Tang, H., Zhang, Z., Heinze, C., Iversen, T., Schulz, M.: NCC NorESM2-LM model output prepared for CMIP6 ScenarioMIP ssp126, Earth System Grid Federation, doi:10.22033/ESGF/CMIP6.8248, 2019b.

Seland, Ø., Bentsen, M., Olivieri, D. J. L., Toniazzo, T., Gjermundsen, A., Graff, L. S., Debernard, J. B., Gupta, A. K., He, Y., Kirkevåg, A., Schwinger, J., Tjiputra, J., Aas, K. S., Bethke, I., Fan, Y., Griesfeller, J., Grini, A., Guo, C., Ilicak, M., Karset, I. H. H., Landgren, O. A., Liakka, J., Moseid, K. O., Nummelin, A., Spensberger, C., Tang, H., Zhang, Z., Heinze, C., Iversen, T., Schulz, M.: NCC NorESM2-LM model output prepared for CMIP6 ScenarioMIP ssp245, Earth System Grid Federation, doi:10.22033/ESGF/CMIP6.8253, 2019c.

Seland, Ø., Bentsen, M., Olivieri, D. J. L., Toniazzo, T., Gjermundsen, A., Graff, L. S., Debernard, J. B., Gupta, A. K., He, Y., Kirkevåg, A., Schwinger, J., Tjiputra, J., Aas, K. S., Bethke, I., Fan, Y., Griesfeller, J., Grini, A., Guo, C., Ilicak, M., Karset, I. H. H., Landgren, O. A., Liakka, J., Moseid, K. O., Nummelin, A., Spensberger, C., Tang, H., Zhang, Z., Heinze, C., Iversen, T., Schulz, M.: NCC NorESM2-LM model output prepared for CMIP6 ScenarioMIP ssp585, Earth System Grid Federation, Earth System Grid Federation, doi:10.22033/ESGF/CMIP6.8319, 2019c.

Sellar, A. A., Jones, C. G., Mulcahy, J. P., Tang, Y., Yool, A., Wiltshire, A., O'Connor, F. M., Stringer, M., Hill, R., Palmieri, J., Woodward, S., de Mora, L., Kuhlbrodt, T., Rumbold, S. T., Kelley, D. I., Ellis, R., Johnson, C. E., Walton, J., Abraham, N. L., Andrews, M. B., Andrews, T., Archibald, A. T., Berthou, S., Burke, E., Blockley, E., Carslaw, K., Dalvi, M., Edwards, J., Folberth, G. A., Gedney, N., Griffiths, P. T., Harper, A. B., Hendry, M. A., Hewitt, A. J., Johnson, B., Jones, A., Jones, C. D., Keeble, J., Liddicoat, S., Morgenstern, O., Parker, R. J., Predoi, V., Robertson, E., Siahann, A., Smith, R. S., Swaminathan, R., Woodhouse, M. T., Zeng, G., and Zerroukat, M.: UKESM1: Description and evaluation of the U. K. Earth System Model, *J. Adv. Model. Earth Syst.*, 11, 4513–4558, doi:10.1029/2019MS001739, 2019.

Swart, N. C., Cole, J. N. S., Kharin, V. V., Lazare, M., Scinocca, J. F., Gillett, N. P., Anstey, J., Arora, V., Christian, J. R., Hanna, S., Jiao, Y., Lee, W. G., Majaess, F., Saenko, O. A., Seiler, C., Seinen, C., Shao, A., Sigmund, M., Solheim, L., von Salzen, K., Yang, D., and Winter, B.: The Canadian Earth System Model version 5 (CanESM5.0.3), *Geosci. Model Dev.*, 12, 4823–4873, doi:10.5194/gmd-12-4823-2019, 2019a.

Swart, N. C., Cole, J. N. S., Kharin, V. V., Lazare, M., Scinocca, J. F., Gillett, N. P., Anstey, J., Arora, V., Christian, J. R., Jiao, Y., Lee, W. G., Majaess, F., Saenko, O. A., Seiler, C., Seinen, C., Shao, A., Solheim, L.,

von Salzen, K., Yang, D., Winter, B., Sigmond, M.: CCCma CanESM5 model output prepared for CMIP6 CMIP historical, Earth System Grid Federation, doi:10.22033/ESGF/CMIP6.3610, 2019b.

Swart, N. C., Cole, J. N. S., Kharin, V. V., Lazare, M., Scinocca, J. F., Gillett, N. P., Anstey, J., Arora, V., Christian, J. R., Jiao, Y., Lee, W. G., Majaess, F., Saenko, O. A., Seiler, C., Seinen, C., Shao, A., Solheim, L., von Salzen, K., Yang, D., Winter, B., Sigmond, M.: CCCma CanESM5 model output prepared for CMIP6 ScenarioMIP ssp126, Earth System Grid Federation, doi:10.22033/ESGF/CMIP6.3683, 2019c.

Swart, N. C., Cole, J. N. S., Kharin, V. V., Lazare, M., Scinocca, J. F., Gillett, N. P., Anstey, J., Arora, V., Christian, J. R., Jiao, Y., Lee, W. G., Majaess, F., Saenko, O. A., Seiler, C., Seinen, C., Shao, A., Solheim, L., von Salzen, K., Yang, D., Winter, B., Sigmond, M.: CCCma CanESM5 model output prepared for CMIP6 ScenarioMIP ssp245, Earth System Grid Federation, doi:https://doi.org/10.22033/ESGF/CMIP6.3685, 2019d.

Swart, N. C., Cole, J. N. S., Kharin, V. V., Lazare, M., Scinocca, J. F., Gillett, N. P., Anstey, J., Arora, V., Christian, J. R., Jiao, Y., Lee, W. G., Majaess, F., Saenko, O. A., Seiler, C., Seinen, C., Shao, A., Solheim, L., von Salzen, K., Yang, D., Winter, B., Sigmond, M.: CCCma CanESM5 model output prepared for CMIP6 ScenarioMIP ssp585, Earth System Grid Federation, doi:10.22033/ESGF/CMIP6.3696, 2019e.

Swart, N. C., Cole, J. N. S., Kharin, V. V., Lazare, M., Scinocca, J. F., Gillett, N. P., Anstey, J., Arora, V., Christian, J. R., Jiao, Y., Lee, W. G., Majaess, F., Saenko, O. A., Seiler, C., Seinen, C., Shao, A., Solheim, L., von Salzen, K., Yang, D., Winter, B., Sigmond, M.: CCCma CanESM5-CanOE model output prepared for CMIP6 CMIP historical, Earth System Grid Federation, doi:10.22033/ESGF/CMIP6.10260, 2019f.

Swart, N. C., Cole, J. N. S., Kharin, V. V., Lazare, M., Scinocca, J. F., Gillett, N. P., Anstey, J., Arora, V., Christian, J. R., Jiao, Y., Lee, W. G., Majaess, F., Saenko, O. A., Seiler, C., Seinen, C., Shao, A., Solheim, L., von Salzen, K., Yang, D., Winter, B., Sigmond, M.: CCCma CanESM5-CanOE model output prepared for CMIP6 ScenarioMIP ssp126, Earth System Grid Federation, doi: 10.22033/ESGF/CMIP6.10269, 2019g.

Swart, N. C., Cole, J. N. S., Kharin, V. V., Lazare, M., Scinocca, J. F., Gillett, N. P., Anstey, J., Arora, V., Christian, J. R., Jiao, Y., Lee, W. G., Majaess, F., Saenko, O. A., Seiler, C., Seinen, C., Shao, A., Solheim, L., von Salzen, K., Yang, D., Winter, B., Sigmond, M.: CCCma CanESM5-CanOE model output prepared for CMIP6 ScenarioMIP ssp245, Earth System Grid Federation, doi:10.22033/ESGF/CMIP6.10270, 2019h.

Swart, N. C., Cole, J. N. S., Kharin, V. V., Lazare, M., Scinocca, J. F., Gillett, N. P., Anstey, J., Arora, V., Christian, J. R., Jiao, Y., Lee, W. G., Majaess, F., Saenko, O. A., Seiler, C., Seinen, C., Shao, A., Solheim, L., von Salzen, K., Yang, D., Winter, B., Sigmond, M.: CCCma CanESM5-CanOE model output prepared for CMIP6 ScenarioMIP ssp585, Earth System Grid Federation, doi:10.22033/ESGF/CMIP6.10276, 2019i.

Tachiiri, K., Abe, M., Hajima, T., Arakawa, O., Suzuki, T., Komuro, Y., Ogochi, K., Watanabe, M., Yamamoto, A., Tatebe, H., Noguchi, M. A., Ohgaito, R., Ito, A., Yamazaki, D., Ito, A., Takata, K., Watanabe, S., Kawamiya, M.: MIROC MIROC-ES2L model output prepared for CMIP6 ScenarioMIP ssp126, Earth System Grid Federation, doi:10.22033/ESGF/CMIP6.5742, 2019a.

Tachiiri, K., Abe, M., Hajima, T., Arakawa, O., Suzuki, T., Komuro, Y., Ogochi, K., Watanabe, M., Yamamoto, A., Tatebe, H., Noguchi, M. A., Ohgaito, R., Ito, A., Yamazaki, D., Ito, A., Takata, K., Watanabe, S., Kawamiya, M.: MIROC MIROC-ES2L model output prepared for CMIP6 ScenarioMIP ssp245, Earth System Grid Federation, doi:10.22033/ESGF/CMIP6.5745, 2019b.

Tachiiri, K., Abe, M., Hajima, T., Arakawa, O., Suzuki, T., Komuro, Y., Ogochi, K., Watanabe, M., Yamamoto, A., Tatebe, H., Noguchi, M. A., Ohgaito, R., Ito, A., Yamazaki, D., Ito, A., Takata, K., Watanabe, S., Kawamiya, M.: MIROC MIROC-ES2L model output prepared for CMIP6 ScenarioMIP ssp585, Earth System Grid Federation, doi:10.22033/ESGF/CMIP6.5770, 2019c.

Tang, Y., Rumbold, S., Ellis, R., Kelley, D., Mulcahy, J., Sellar, A., Walton, J., Jones, C.: MOHC UKESM1.0-LL model output prepared for CMIP6 CMIP historical. Earth System Grid Federation, doi:10.22033/ESGF/CMIP6.6113, 2019.

Volodin, E., Mortikov, E., Gritsun, A., Lykossov, V., Galin, V., Diansky, N., Gusev, A., Kostykin, S., Iakovlev, N., Shestakova, A., Emelina, S.: INM INM-CM4-8 model output prepared for CMIP6 CMIP historical, Earth System Grid Federation, doi:10.22033/ESGF/CMIP6.5069, 2019a.

Tjiputra, J. F., Schwinger, J., Bentsen, M., Morée, A. L., Gao, S., Bethke, I., Heinze, C., Goris, N., Gupta, A., He, Y.-C., Olivié, D., Seland, Ø., and Schulz, M.: Ocean biogeochemistry in the Norwegian Earth System Model version 2 (NorESM2), *Geosci. Model Dev.*, 13, 2393–2431, doi:0.5194/gmd-13-2393-2020, 2020.

Voltaire, A., Saint-Martin, D., Sénési, S., Decharme, B., Alias, A., Chevallier, M., Colin, J., Guérémy, J.-F., Michou, M., Moine, M.-P., Nabat, P., Roehrig, R., Salas y Méliá, D., Séférian, R., Valcke, S., Beau, I., Belamari, S., Berthet, S., Cassou, C., Cattiaux, J., Deshayes, J., Douville, H., Ethé, C., Franchistéguy, L., Geoffroy, O., Lévy, C., Madec, G., Meurdesoif, Y., Msadek, R., Ribes, A., Sanchez-Gomez, E., Terray, L., and Waldman, R.: Evaluation of CMIP6 DECK experiments with CNRM-CM6-1, *J. Adv. Model. Earth Syst.*, 11, 2177–2213, doi:10.1029/2019MS001683, 2019.

Volodin, E. M., Mortikov, E. V., Kostykin, S. V., Galin, V. Y., Lykossov, V. N., Diansky, N. A., Gusev, A. V., and Iakovlev, N. G.: Simulation of the present-day climate with the climate model INMCM5, *Clim. Dynam.*, 49, 3715–3734, doi:10.1007/s00382-017-3539-7, 2017.

Volodin, E. M., Mortikov, E. V., Kostykin, S. V., Galin, V. Y., Lykossov, V. N., Gritsun, A. S., Diansky, N. A., Gusev, A. V., Iakovlev, N. G., Shestakova, A. A., and Emelina, S. V.: Simulation of the modern climate using the INM-CM48 climate model, *Russ. J. Numer. Anal. Math. Model.*, 33, 367–374, doi:10.1515/rnam-2018-0032, 2018.

Volodin, E., Mortikov, E., Gritsun, A., Lykossov, V., Galin, V., Diansky, N., Gusev, A., Kostykin, S., Iakovlev, N., Shestakova, A., Emelina, S.: INM INM-CM4-8 model output prepared for CMIP6 CMIP historical, Earth System Grid Federation, doi:10.22033/ESGF/CMIP6.5069, 2019a.

Volodin, E., Mortikov, E., Gritsun, A., Lykossov, V., Galin, V., Diansky, N., Gusev, A., Kostykin, S., Iakovlev, N., Shestakova, A., Emelina, S.: INM INM-CM4-8 model output prepared for CMIP6 ScenarioMIP ssp126. Earth System Grid Federation, doi:10.22033/ESGF/CMIP6.12325, 2019b.

Volodin, E., Mortikov, E., Gritsun, A., Lykossov, V., Galin, V., Diansky, N., Gusev, A., Kostykin, S., Iakovlev, N., Shestakova, A., Emelina, S.: INM INM-CM4-8 model output prepared for CMIP6 ScenarioMIP ssp245. Earth System Grid Federation, doi:10.22033/ESGF/CMIP6.12327, 2019c.

Volodin, E., Mortikov, E., Gritsun, A., Lykossov, V., Galin, V., Diansky, N., Gusev, A., Kostykin, S., Iakovlev, N., Shestakova, A., Emelina, S.: INM INM-CM4-8 model output prepared for CMIP6 ScenarioMIP ssp585. Earth System Grid Federation, doi:10.22033/ESGF/CMIP6.12337, 2019d.

Volodin, E., Mortikov, E., Gritsun, A., Lykossov, V., Galin, V., Diansky, N., Gusev, A., Kostykin, S., Iakovlev, N., Shestakova, A., Emelina, S.: INM INM-CM5-0 model output prepared for CMIP6 CMIP historical, Earth System Grid Federation, doi:10.22033/ESGF/CMIP6.5070, 2019e.

Volodin, E., Mortikov, E., Gritsun, A., Lykossov, V., Galin, V., Diansky, N., Gusev, A., Kostykin, S., Iakovlev, N., Shestakova, A., Emelina, S.: INM INM-CM5-0 model output prepared for CMIP6 ScenarioMIP ssp126, Earth System Grid Federation, doi:10.22033/ESGF/CMIP6.12326, 2019f.

Volodin, E., Mortikov, E., Gritsun, A., Lykossov, V., Galin, V., Diansky, N., Gusev, A., Kostyrykin, S., Iakovlev, N., Shestakova, A., Emelina, S.: INM INM-CM5-0 model output prepared for CMIP6 ScenarioMIP ssp245, Earth System Grid Federation, Earth System Grid Federation. doi:<https://doi.org/10.22033/ESGF/CMIP6.12328>, 2019g.

Volodin, E., Mortikov, E., Gritsun, A., Lykossov, V., Galin, V., Diansky, N., Gusev, A., Kostyrykin, S., Iakovlev, N., Shestakova, A., Emelina, S.: INM INM-CM5-0 model output prepared for CMIP6 ScenarioMIP ssp585, Earth System Grid Federation, Earth System Grid Federation. Earth System Grid Federation. doi:[10.22033/ESGF/CMIP6.12338](https://doi.org/10.22033/ESGF/CMIP6.12338), 2019h.

Wieners, KH., Giorgetta, M., Jungclaus, J., Reick, C., Esch, M., Bittner, M., Legutke, S., Schupfner, M., Wachsmann, F., Gayler, V., Haak, H., de Vrese, P., Raddatz, T., Mauritsen, T., von Storch, JS., Behrens, J., Brovkin, V., Claussen, M., Crueger, T., Fast, I., Fiedler, S., Hagemann, S., Hohenegger, C., Jahns, T., Kloster, S., Kinne, S., Lasslop, G., Kornblueh, L., Marotzke, J., Matei, D., Meraner, K., Mikolajewicz, U., Modali, K., Müller, W., Nabel, J., Notz, D., Peters-von Gehlen, K., Pincus, R., Pohlmann, H., Pongratz, J., Rast, S., Schmidt, H., Schnur, R., Schulzweida, U., Six, K., Stevens, B., Voigt, A., Roeckner, E.: MPI-M MPI-ESM1.2-LR model output prepared for CMIP6 CMIP historical, Earth System Grid Federation, doi:[10.22033/ESGF/CMIP6.6595](https://doi.org/10.22033/ESGF/CMIP6.6595), 2019a.

Wieners, KH., Giorgetta, M., Jungclaus, J., Reick, C., Esch, M., Bittner, M., Legutke, S., Schupfner, M., Wachsmann, F., Gayler, V., Haak, H., de Vrese, P., Raddatz, T., Mauritsen, T., von Storch, JS., Behrens, J., Brovkin, V., Claussen, M., Crueger, T., Fast, I., Fiedler, S., Hagemann, S., Hohenegger, C., Jahns, T., Kloster, S., Kinne, S., Lasslop, G., Kornblueh, L., Marotzke, J., Matei, D., Meraner, K., Mikolajewicz, U., Modali, K., Müller, W., Nabel, J., Notz, D., Peters-von Gehlen, K., Pincus, R., Pohlmann, H., Pongratz, J., Rast, S., Schmidt, H., Schnur, R., Schulzweida, U., Six, K., Stevens, B., Voigt, A., Roeckner, E.: MPI-M MPI-ESM1.2-LR model output prepared for CMIP6 ScenarioMIP ssp126, Earth System Grid Federation, doi:[10.22033/ESGF/CMIP6.6690](https://doi.org/10.22033/ESGF/CMIP6.6690), 2019b.

Wieners, KH., Giorgetta, M., Jungclaus, J., Reick, C., Esch, M., Bittner, M., Legutke, S., Schupfner, M., Wachsmann, F., Gayler, V., Haak, H., de Vrese, P., Raddatz, T., Mauritsen, T., von Storch, JS., Behrens, J., Brovkin, V., Claussen, M., Crueger, T., Fast, I., Fiedler, S., Hagemann, S., Hohenegger, C., Jahns, T., Kloster, S., Kinne, S., Lasslop, G., Kornblueh, L., Marotzke, J., Matei, D., Meraner, K., Mikolajewicz, U., Modali, K., Müller, W., Nabel, J., Notz, D., Peters-von Gehlen, K., Pincus, R., Pohlmann, H., Pongratz, J., Rast, S., Schmidt, H., Schnur, R., Schulzweida, U., Six, K., Stevens, B., Voigt, A., Roeckner, E.: MPI-M MPI-ESM1.2-LR model output prepared for CMIP6 ScenarioMIP ssp245, Earth System Grid Federation, doi:[10.22033/ESGF/CMIP6.6693](https://doi.org/10.22033/ESGF/CMIP6.6693), 2019c.

Wieners, KH., Giorgetta, M., Jungclaus, J., Reick, C., Esch, M., Bittner, M., Legutke, S., Schupfner, M., Wachsmann, F., Gayler, V., Haak, H., de Vrese, P., Raddatz, T., Mauritsen, T., von Storch, JS., Behrens, J., Brovkin, V., Claussen, M., Crueger, T., Fast, I., Fiedler, S., Hagemann, S., Hohenegger, C., Jahns, T., Kloster, S., Kinne, S., Lasslop, G., Kornblueh, L., Marotzke, J., Matei, D., Meraner, K., Mikolajewicz, U., Modali, K., Müller, W., Nabel, J., Notz, D., Peters-von Gehlen, K., Pincus, R., Pohlmann, H., Pongratz, J., Rast, S., Schmidt, H., Schnur, R., Schulzweida, U., Six, K., Stevens, B., Voigt, A., Roeckner, E.: MPI-M MPI-ESM1.2-LR model output prepared for CMIP6 ScenarioMIP ssp585, Earth System Grid Federation, doi:[10.22033/ESGF/CMIP6.6705](https://doi.org/10.22033/ESGF/CMIP6.6705), 2019d.

Williams, K. D., Copsey, D., Blockley, E. W., Bodas-Salcedo, A., Calvert, D., Comer, R., Davis, P., Graham, T., Hewitt, H. T., Hill, R., Hyder, P., Ineson, S., Johns, T. C., Keen, A. B., Lee, R. W., Megann, A., Milton, S. F., Rae, J. G. L., Roberts, M. J., Scaife, A. A., Schiemann, R., Storkey, D., Thorpe, L., Watterson, I. G., Walters, D. N., West, A., Wood, R. A., Woollings, T., and Xavier, P. K.: The Met Office Global Coupled model 3.0 and 3.1 (GC3.0 and GC3.1) configurations, *J. Adv. Model. Earth Syst.*, 10, 357–380, doi:[10.1002/2017MS001115](https://doi.org/10.1002/2017MS001115), 2017.

Wu, T., Lu, Y., Fang, Y., Xin, X., Li, L., Li, W., Jie, W., Zhang, J., Liu, Y., Zhang, L., Zhang, F., Zhang, Y., Wu, F., Li, J., Chu, M., Wang, Z., Shi, X., Liu, X., Wei, M., Huang, A., Zhang, Y., and Liu, X.: The Beijing Climate Center Climate System Model (BCC-CSM): the main progress from CMIP5 to CMIP6, *Geosci. Model Dev.*, 12, 1573–1600, doi:10.5194/gmd-12-1573-2019, 2019.

Xin, X.-G., Wu, T.-W., Zhang, J., Zhang, F., Li, W.-P., Zhang, Y.-W., Lu, Y.-X., Fang, Y.-J., Jie, W.-H., Zhang, L., Dong, M., Shi, X.-L., Li, J.-L., Chu, M., Liu, Q.-X., and Yan, J.-H.: Introduction of BCC models and its participation in CMIP6, *Clim. Change Res.*, 15, 533–539, doi:10.12006/j.issn.1673-1719.2019.039, 2019

PANGEO Gallery, Google Cloud CMIP6 Public Data: <https://storage.googleapis.com/cmip6/cmip6-zarr-consolidated-stores.csv>
